# Supplementary material
Source: MDPI journal article supplement (https://www.mdpi.com/2073-4352/13/10/1528)
Supplement: s1 [file s1]

**Table of Contents:**

|                                                                                                                                                                                                                                                                                                |    |
|------------------------------------------------------------------------------------------------------------------------------------------------------------------------------------------------------------------------------------------------------------------------------------------------|----|
| Section S1. X-ray Crystallography .....                                                                                                                                                                                                                                                        | 2  |
| Fragments of crystal structures of complexes with shown cell axes .....                                                                                                                                                                                                                        | 2  |
| Short inter-chain and inter-molecular contacts.....                                                                                                                                                                                                                                            | 6  |
| <b>Table S1.1.</b> Crystal data for complexes 1, 2, and 3. ....                                                                                                                                                                                                                                | 9  |
| <b>Table S1.2.</b> Crystal data for complexes 3·C <sub>7</sub> H <sub>8</sub> , 4·C <sub>7</sub> H <sub>8</sub> , and Mn(hfac) <sub>2</sub> (NN-Pz-CH <sub>2</sub> CHF <sub>2</sub> )] <sub>n</sub> ·n[Mn(hfac) <sub>2</sub> (NN-Pz-CH <sub>2</sub> CHF <sub>2</sub> )H <sub>2</sub> O)]. .... | 10 |
| <b>Table S1.3.</b> Selected bond distances in 1 (Å).....                                                                                                                                                                                                                                       | 11 |
| <b>Table S1.4.</b> Selected bond distances in 2 (Å).....                                                                                                                                                                                                                                       | 12 |
| <b>Table S1.5.</b> Selected bond distances in 3·C <sub>7</sub> H <sub>8</sub> (Å). ....                                                                                                                                                                                                        | 13 |
| <b>Table S1.6.</b> Selected bond distances in 3 (Å).....                                                                                                                                                                                                                                       | 14 |
| <b>Table S1.7.</b> Selected bond distances in 4·C <sub>7</sub> H <sub>8</sub> (Å). ....                                                                                                                                                                                                        | 15 |
| Section S2. Powder X-ray Diffraction Data.....                                                                                                                                                                                                                                                 | 16 |

## Section S1. X-ray Crystallography

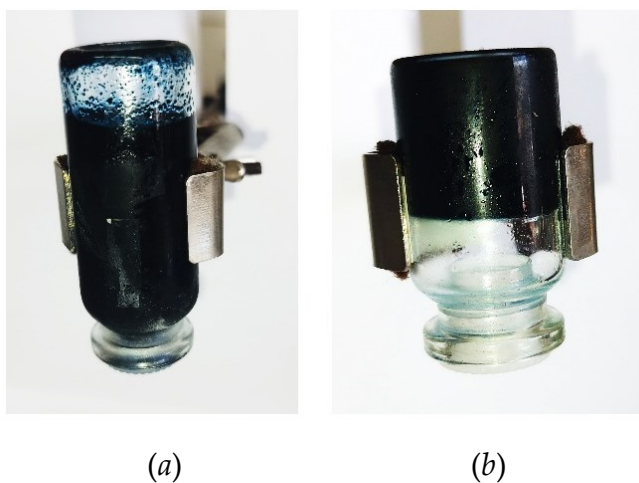

**Figure S1.1.** Images of inverted reaction vessels with reaction mixtures  $[\text{Mn}(\text{hfac})_2] + \text{NN-Pz-CHF}_2$  (a) and  $[\text{Mn}(\text{hfac})_2] + \text{NN-Pz-CH}_2\text{CH}_2\text{F}$  (b) after incubation at  $-15\text{ }^\circ\text{C}$  for 24 h.

Fragments of crystal structures of complexes with shown cell axes

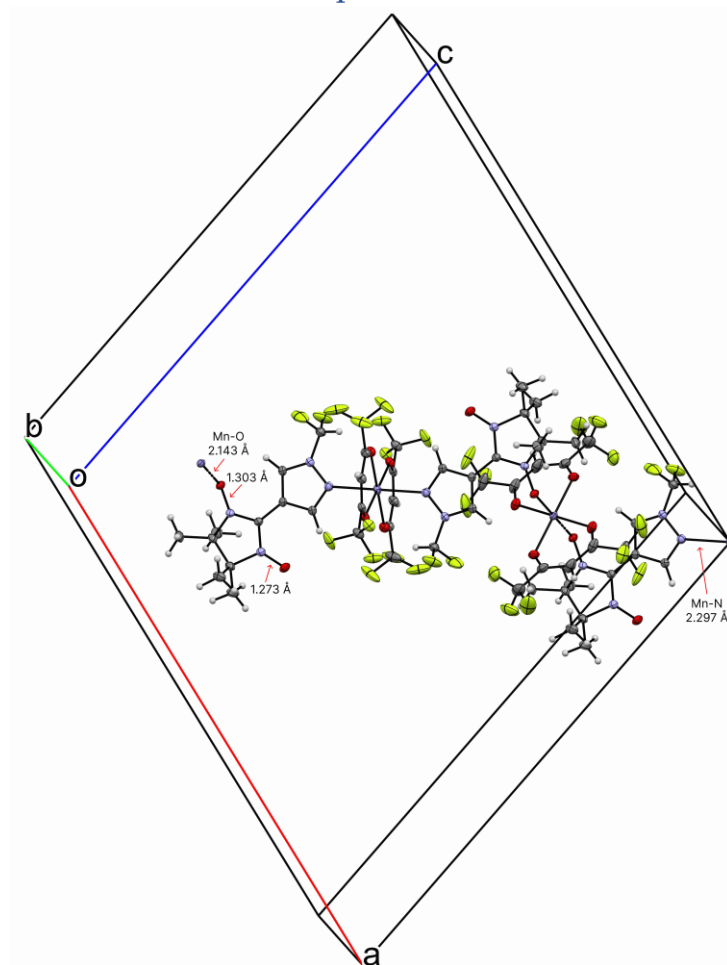

**Figure S1.2.** View of a fragment of the chain in 1. Hereinafter, thermal ellipsoids are drawn with 50% probability.

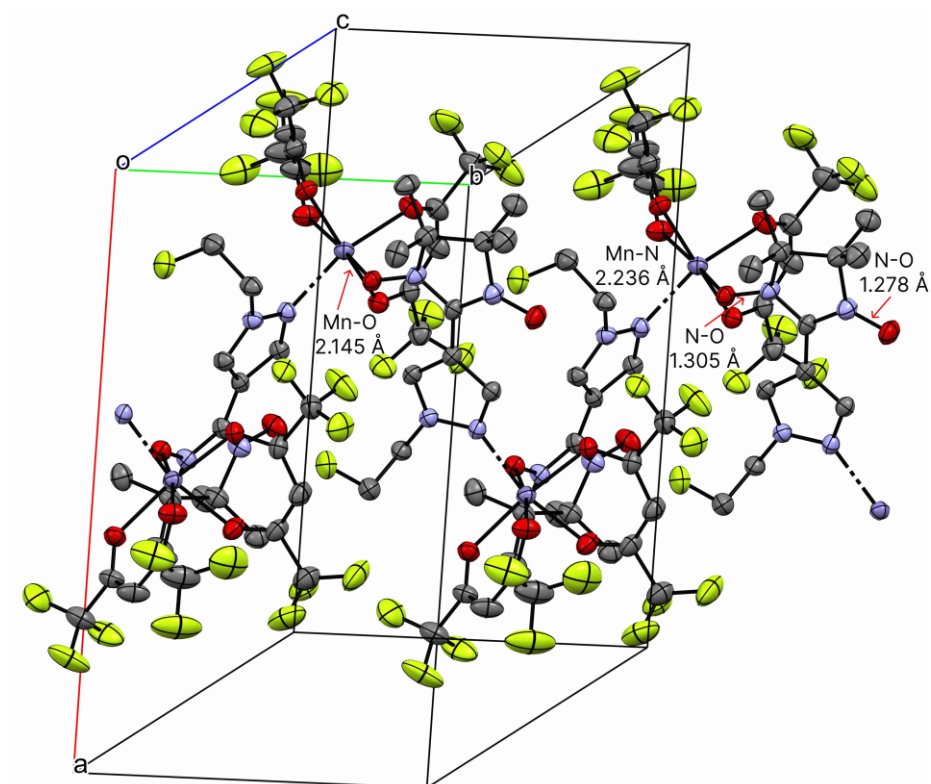

**Figure S1.3.** View of a fragment of the chain in 2.

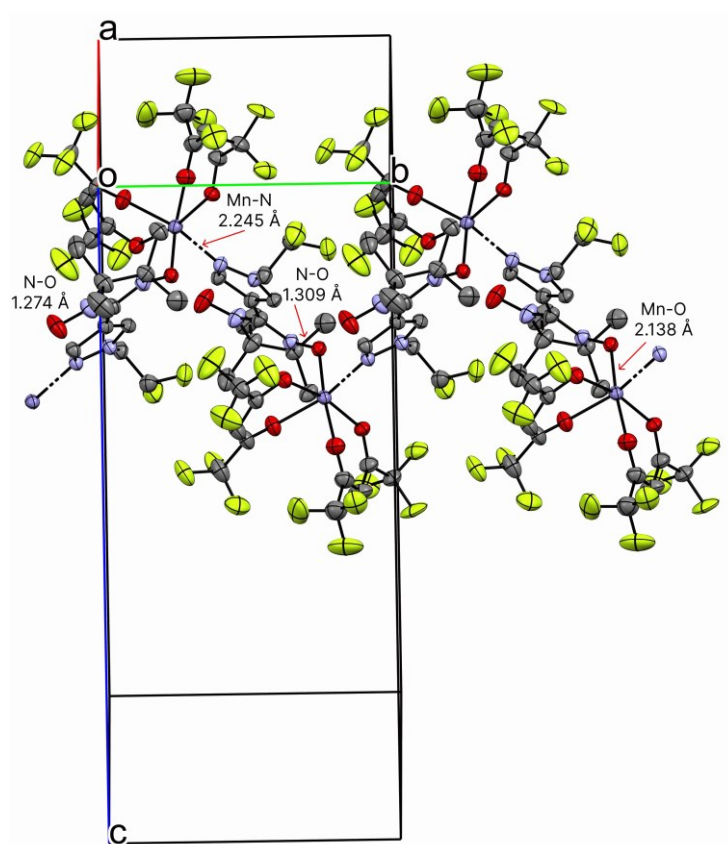

**Figure S1.4.** View of a fragment of the chain in 3·C<sub>7</sub>H<sub>8</sub>.

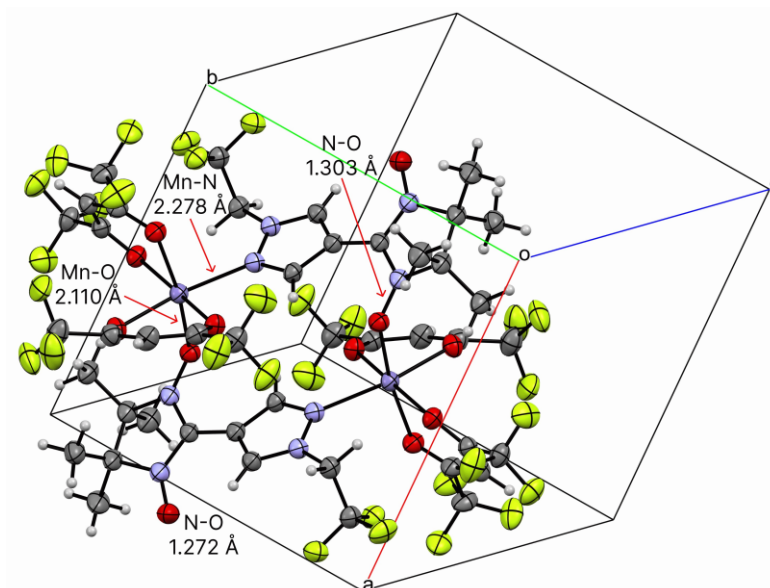

**Figure S1.5.** View of a fragment of the chain in 4·C<sub>7</sub>H<sub>8</sub>.

In one of the experiments, co-crystals of  $[\text{Mn}(\text{hfac})_2(\text{NN-Pz-CH}_2\text{CHF}_2)]_n$  with  $[\text{Mn}(\text{hfac})_2(\text{NN-Pz-CH}_2\text{CHF}_2)\text{H}_2\text{O}]$  were isolated and successfully characterised by the single-crystal X-ray analysis (Figure S1.6). The structure of the complex is formed by packing of chains with geometry similar to that in  $[\text{Mn}(\text{hfac})_2(\text{NN-Pz-CH}_2\text{CHF}_2)]_n$  and molecular complexes  $[\text{Mn}(\text{hfac})_2(\text{NN-Pz-CH}_2\text{CHF}_2)\text{H}_2\text{O}]$  containing a coordinated water molecule. It is noteworthy here that in  $[\text{Mn}(\text{hfac})_2(\text{NN-Pz-CH}_2\text{CHF}_2)\text{H}_2\text{O}]$ , the paramagnetic ligand is coordinated by the oxygen atom of the nitroxide group, consistently with the oxophilic nature of the Mn ion.

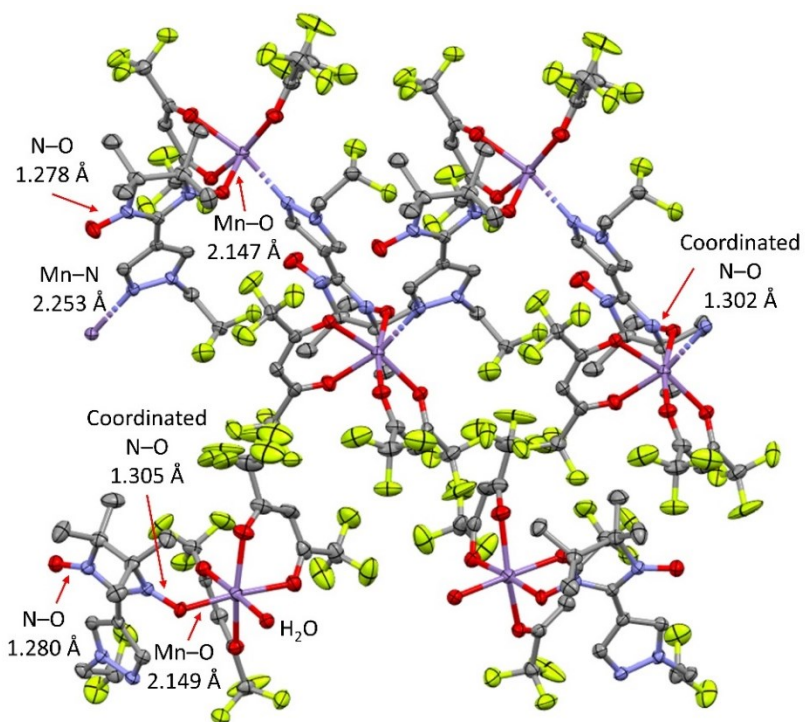

**Figure S1.6.** View of a fragment of the crystal structure of  $[\text{Mn}(\text{hfac})_2(\text{NN-Pz-CH}_2\text{CHF}_2)]_n \cdot n[\text{Mn}(\text{hfac})_2(\text{NN-Pz-CH}_2\text{CHF}_2)\text{H}_2\text{O}]$ .

## Short inter-chain and inter-molecular contacts

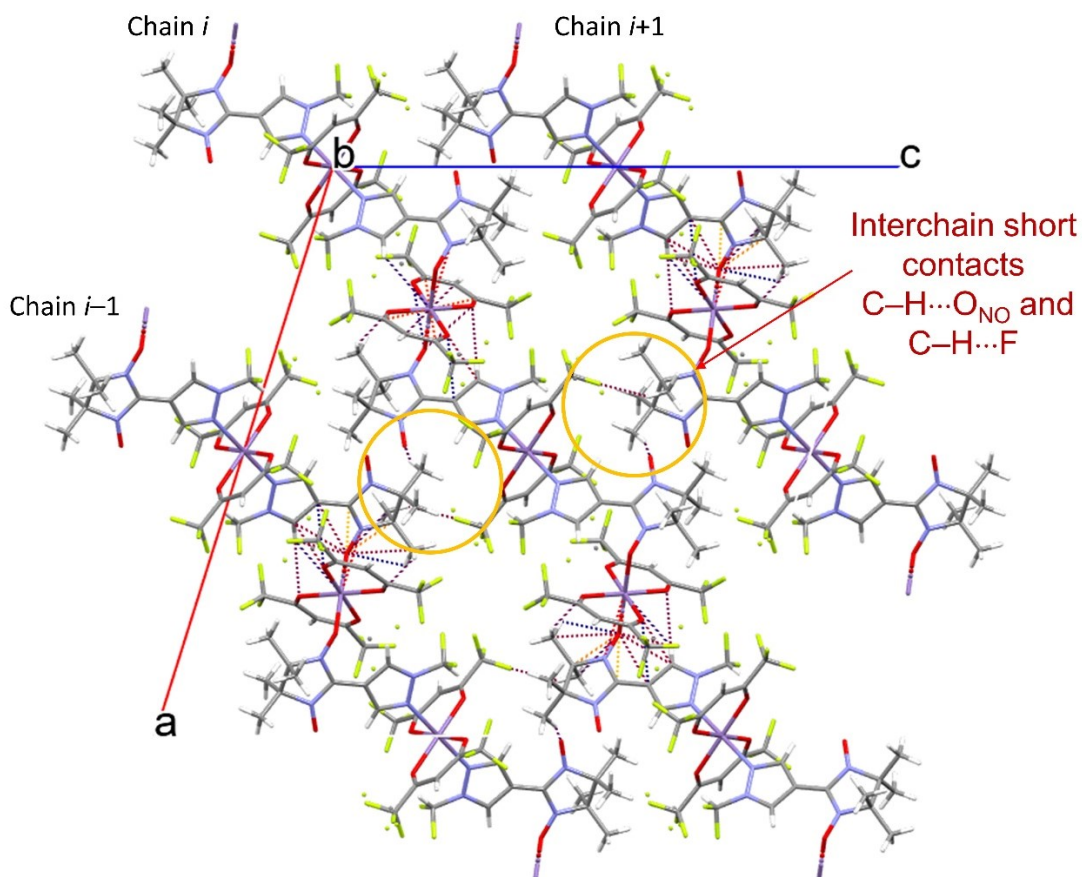

**Figure S1.7.** A fragment of crystal structure of 1 with short inter-chain contacts  $C-H\cdots O_{NO}$  (2.539 Å) and  $C-H\cdots F$  (2.396 Å).

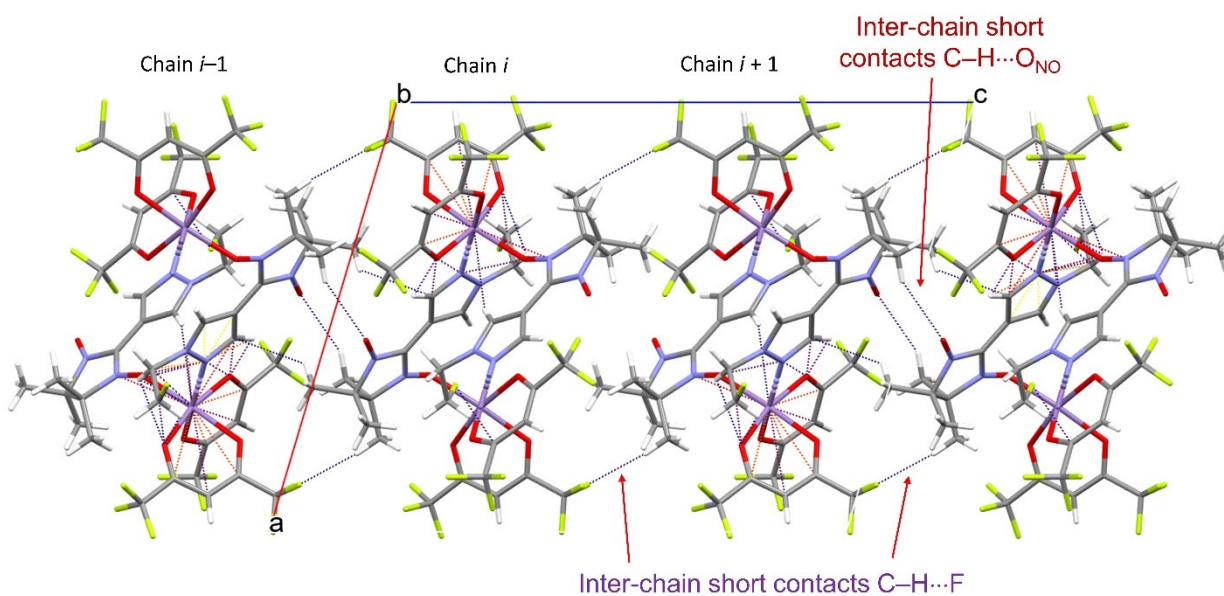

**Figure S1.8.** A fragment of crystal structure of 2 with short inter-chain contacts  $C-H\cdots O_{NO}$  (2.665 Å) and  $C-H\cdots F$  (2.557 Å).



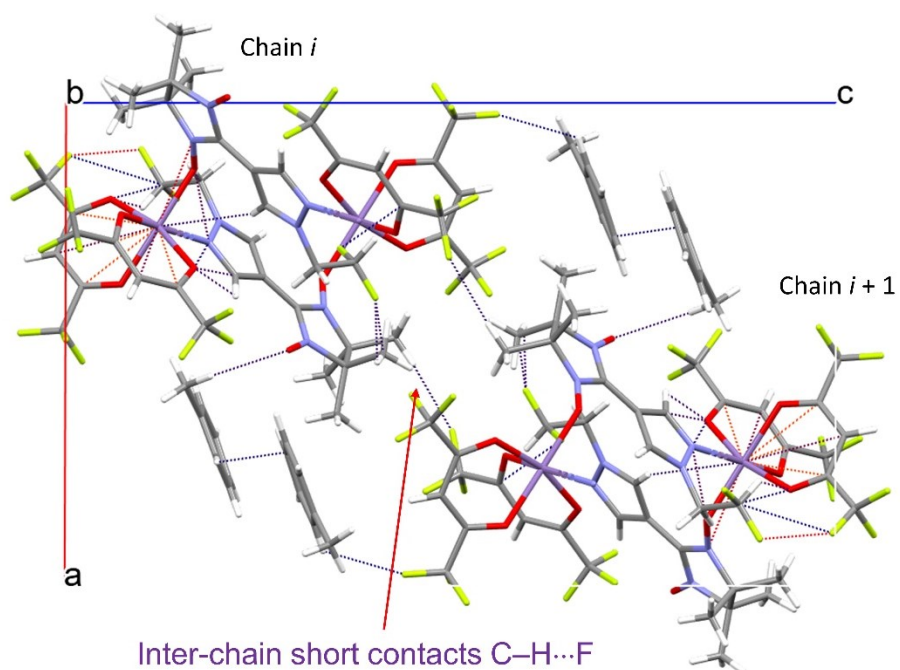

**Figure S1.9.** A fragment of crystal structure of 3·C<sub>7</sub>H<sub>8</sub> with short inter-chain contacts C-H...F (2.576 Å).

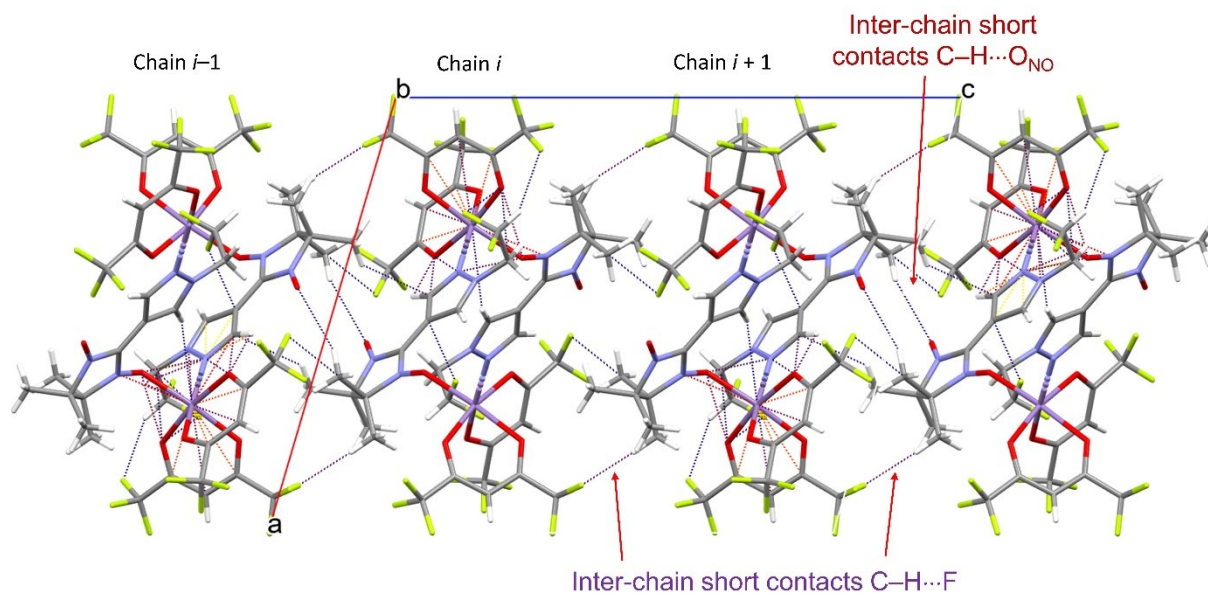

**Figure S1.10.** A fragment of crystal structure of 3 with short inter-chain contacts C-H...ONO (2.640 Å) and C-H...F (2.490 Å).

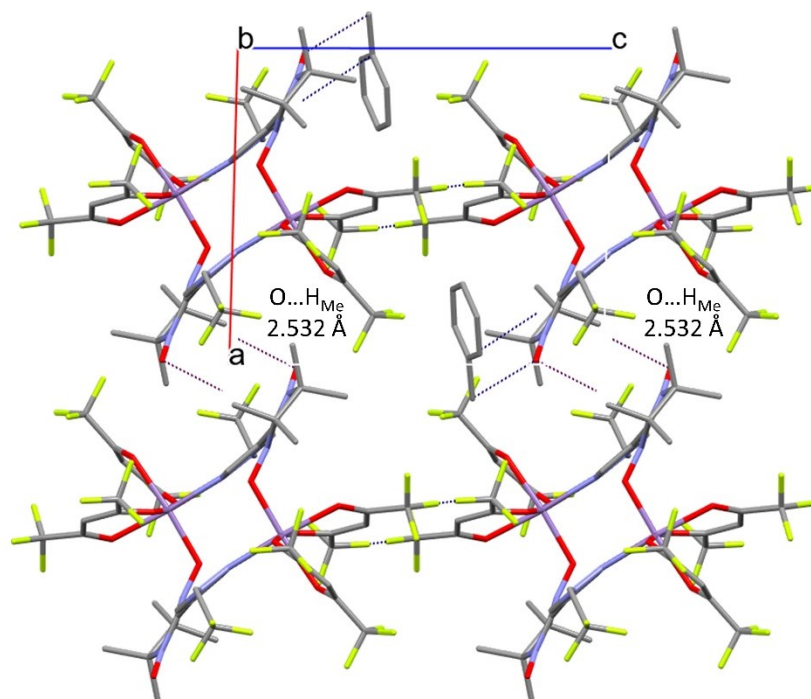

**Figure S1.11.** A fragment of crystal structure of 4-C<sub>7</sub>H<sub>8</sub> (hydrogen atoms are not shown).



**Table S1.1.** Crystal data for complexes 1, 2, and 3.

| Compound                                                              | 1                                                                               | 2                                                                               | 3                                                                               |
|-----------------------------------------------------------------------|---------------------------------------------------------------------------------|---------------------------------------------------------------------------------|---------------------------------------------------------------------------------|
| Empirical formula                                                     | C <sub>21</sub> H <sub>17</sub> F <sub>14</sub> MnN <sub>4</sub> O <sub>6</sub> | C <sub>22</sub> H <sub>20</sub> F <sub>13</sub> MnN <sub>4</sub> O <sub>6</sub> | C <sub>22</sub> H <sub>19</sub> F <sub>14</sub> MnN <sub>4</sub> O <sub>6</sub> |
| Formula weight                                                        | 742.33                                                                          | 738.36                                                                          | 756.35                                                                          |
| Temperature, K                                                        | 100.0(1)                                                                        | 100.0(1)                                                                        | 100.0(1)                                                                        |
| Wavelength, Å                                                         | 1.54184                                                                         | 1.54184                                                                         | 0.71073                                                                         |
| Crystal system                                                        | Monoclinic                                                                      | Monoclinic                                                                      | Monoclinic                                                                      |
| Space group                                                           | I2/a                                                                            | P2 <sub>1</sub> /c                                                              | P2 <sub>1</sub> /c                                                              |
| Unit cell dimensions                                                  |                                                                                 |                                                                                 |                                                                                 |
| <i>a</i> , Å                                                          | 26.0180(2)                                                                      | 16.0023(4)                                                                      | 16.0909(8)                                                                      |
| <i>b</i> , Å                                                          | 9.42480(10)                                                                     | 9.7163(2)                                                                       | 9.9125(4)                                                                       |
| <i>c</i> , Å                                                          | 24.7301(2)                                                                      | 20.6248(5)                                                                      | 20.0481(9)                                                                      |
| $\alpha$ , °                                                          | 90                                                                              | 90                                                                              | 90                                                                              |
| $\beta$ , °                                                           | 107.3830(10)                                                                    | 106.565(3)                                                                      | 106.374(3)                                                                      |
| $\gamma$ , °                                                          | 90                                                                              | 90                                                                              | 90                                                                              |
| Volume, Å <sup>3</sup>                                                | 5787.22(9)                                                                      | 3073.72(13)                                                                     | 3068.0(2)                                                                       |
| <i>Z</i>                                                              | 8                                                                               | 4                                                                               | 4                                                                               |
| Density (calcd.), g·cm <sup>-3</sup>                                  | 1.704                                                                           | 1.596                                                                           | 1.637                                                                           |
| Abs. coefficient, mm <sup>-1</sup>                                    | 4.975                                                                           | 4.630                                                                           | 0.558                                                                           |
| <i>F</i> (000)                                                        | 2960                                                                            | 1480                                                                            | 1512                                                                            |
| Crystal size, mm                                                      | 0.70×0.11×0.07                                                                  | 0.05×0.03×0.02                                                                  | 0.23×0.31×0.39                                                                  |
| $\Theta$ range, °                                                     | 3.560 – 77.383                                                                  | 2.867 – 77.066                                                                  | 2.312 – 30.440                                                                  |
| Index ranges                                                          | –32 ≤ <i>h</i> ≤ 31,<br>–11 ≤ <i>k</i> ≤ 11,<br>–30 ≤ <i>l</i> ≤ 31             | –20 ≤ <i>h</i> ≤ 19,<br>–12 ≤ <i>k</i> ≤ 11,<br>–25 ≤ <i>l</i> ≤ 26             | –17 ≤ <i>h</i> ≤ 21,<br>–13 ≤ <i>k</i> ≤ 12,<br>–26 ≤ <i>l</i> ≤ 22             |
| Reflections                                                           |                                                                                 |                                                                                 |                                                                                 |
| collected                                                             | 40209                                                                           | 40300                                                                           | 30917                                                                           |
| independent [ <i>R</i> <sub>int</sub> ]                               | 6100 [0.0338]                                                                   | 6516 [0.0766]                                                                   | 7313 [0.0908]                                                                   |
| observed with <i>I</i> > 2 $\sigma$ ( <i>I</i> )                      | 5800                                                                            | 5201                                                                            | 4577                                                                            |
| Completeness to $\theta_{\text{full}}$ / $\theta_{\text{max}}$        | 1.000 / 0.989                                                                   | 0.999 / 0.989                                                                   | 0.999 / 0.999                                                                   |
| Data / restraints / parameters                                        | 6100 / 14 / 452                                                                 | 6516 / 0 / 420                                                                  | 7313 / 0 / 429                                                                  |
| Goodness-of-fit on <i>F</i> <sup>2</sup>                              | 1.053                                                                           | 1.054                                                                           | 1.020                                                                           |
| <i>R</i> 1 / <i>wR</i> 2 for <i>I</i> > 2 $\sigma$ ( <i>I</i> )       | 0.0333 / 0.0827                                                                 | 0.0586 / 0.1601                                                                 | 0.0498 / 0.0975                                                                 |
| <i>R</i> 1 / <i>wR</i> 2 (all data)                                   | 0.0352 / 0.0838                                                                 | 0.0714 / 0.1705                                                                 | 0.1009 / 0.1143                                                                 |
| $\Delta Q_{\text{max}}$ / $\Delta Q_{\text{min}}$ , e·Å <sup>-3</sup> | 0.491 / –0.526                                                                  | 0.626 / –0.588                                                                  | 0.474 / –0.520                                                                  |

**Table S1.2.** Crystal data for complexes 3·C<sub>7</sub>H<sub>8</sub>, 4·C<sub>7</sub>H<sub>8</sub>, and Mn(hfac)<sub>2</sub>(NN–Pz–CH<sub>2</sub>CHF<sub>2</sub>)<sub>n</sub>·n[Mn(hfac)<sub>2</sub>(NN–Pz–CH<sub>2</sub>CHF<sub>2</sub>)H<sub>2</sub>O]).

| Compound                                                                     | 3·C <sub>7</sub> H <sub>8</sub>                                                 | 4·C <sub>7</sub> H <sub>8</sub>                                                                | Mn(hfac) <sub>2</sub> (NN–Pz–CH <sub>2</sub> CHF <sub>2</sub> ) <sub>n</sub> ·<br>n[Mn(hfac) <sub>2</sub> (NN–Pz–CH <sub>2</sub> CHF <sub>2</sub> )H <sub>2</sub> O]) |
|------------------------------------------------------------------------------|---------------------------------------------------------------------------------|------------------------------------------------------------------------------------------------|-----------------------------------------------------------------------------------------------------------------------------------------------------------------------|
| Empirical formula                                                            | C <sub>29</sub> H <sub>27</sub> F <sub>14</sub> MnN <sub>4</sub> O <sub>6</sub> | C <sub>58</sub> H <sub>52</sub> F <sub>30</sub> Mn <sub>2</sub> N <sub>8</sub> O <sub>12</sub> | C <sub>22</sub> H <sub>19</sub> F <sub>14</sub> MnN <sub>4</sub> O <sub>6</sub> ·<br>C <sub>22</sub> H <sub>21</sub> F <sub>14</sub> MnN <sub>4</sub> O <sub>7</sub>  |
| Formula weight                                                               | 848.48                                                                          | 1732.95                                                                                        | 1530.72                                                                                                                                                               |
| Temperature, K                                                               | 99.9(3)                                                                         | 99.9(3)                                                                                        | 100                                                                                                                                                                   |
| Wavelength, Å                                                                | 1.54184                                                                         | 1.54184                                                                                        | 0.71073, sealed tube                                                                                                                                                  |
| Crystal system                                                               | Monoclinic                                                                      | Triclinic                                                                                      | Monoclinic                                                                                                                                                            |
| Space group                                                                  | P2 <sub>1</sub> /n                                                              | P 1                                                                                            | P2 <sub>1</sub> /c                                                                                                                                                    |
| Unit cell dimensions                                                         |                                                                                 |                                                                                                |                                                                                                                                                                       |
| <i>a</i> , Å                                                                 | 14.9623(2)                                                                      | 11.01880(10)                                                                                   | 30.298(3)                                                                                                                                                             |
| <i>b</i> , Å                                                                 | 9.98830(10)                                                                     | 12.9099(2)                                                                                     | 9.7710(8)                                                                                                                                                             |
| <i>c</i> , Å                                                                 | 23.8702(4)                                                                      | 13.1514(2)                                                                                     | 21.7394(18)                                                                                                                                                           |
| α, °                                                                         | 90                                                                              | 75.0990(10)                                                                                    | 90                                                                                                                                                                    |
| β, °                                                                         | 90.182(2)                                                                       | 88.1200(10)                                                                                    | 110.106(3)                                                                                                                                                            |
| γ, °                                                                         | 90                                                                              | 76.9370(10)                                                                                    | 90                                                                                                                                                                    |
| Volume, Å <sup>3</sup>                                                       | 3567.33(8)                                                                      | 1760.47(4)                                                                                     | 6043.5(9)                                                                                                                                                             |
| <i>Z</i>                                                                     | 4                                                                               | 1                                                                                              | 4                                                                                                                                                                     |
| Density (calcd.), g·cm <sup>-3</sup>                                         | 1.580                                                                           | 1.635                                                                                          | 1.682                                                                                                                                                                 |
| Abs. coefficient, mm <sup>-1</sup>                                           | 4.117                                                                           | 4.227                                                                                          | 0.569                                                                                                                                                                 |
| <i>F</i> (000)                                                               | 1712                                                                            | 872                                                                                            | 3064                                                                                                                                                                  |
| Crystal size, mm                                                             | 0.35×0.07×0.06                                                                  | 0.32×0.30×0.20                                                                                 | 0.25×0.01×0.01                                                                                                                                                        |
| Θ range, °                                                                   | 3.436 – 77.000                                                                  | 3.465 – 76.624                                                                                 | 1.874 – 26.085                                                                                                                                                        |
| Index ranges                                                                 | –18 ≤ <i>h</i> ≤ 18,<br>–10 ≤ <i>k</i> ≤ 12,<br>–30 ≤ <i>l</i> ≤ 29             | –13 ≤ <i>h</i> ≤ 13,<br>–16 ≤ <i>k</i> ≤ 16,<br>–16 ≤ <i>l</i> ≤ 16                            | –37 ≤ <i>h</i> ≤ 37,<br>–12 ≤ <i>k</i> ≤ 12,<br>–26 ≤ <i>l</i> ≤ 22                                                                                                   |
| Reflections                                                                  |                                                                                 |                                                                                                |                                                                                                                                                                       |
| collected                                                                    | 25876                                                                           | 85727                                                                                          | 38331                                                                                                                                                                 |
| independent [ <i>R</i> <sub>int</sub> ]                                      | 7243 [0.0507]                                                                   | 7377 [0.0968]                                                                                  | 11939 [0.1009]                                                                                                                                                        |
| observed with <i>I</i> > 2σ( <i>I</i> )                                      | 6213                                                                            | 7099                                                                                           | 6316                                                                                                                                                                  |
| Completeness to θ <sub>full</sub> / θ <sub>max</sub>                         | 0.977 / 0.951                                                                   | 0.999 / 0.987                                                                                  | 0.999 / 0.996                                                                                                                                                         |
| Data / restraints / parameters                                               | 7243 / 298 / 602                                                                | 7377 / 129 / 564                                                                               | 11939 / 48 / 875                                                                                                                                                      |
| Goodness-of-fit on <i>F</i> <sup>2</sup>                                     | 1.076                                                                           | 1.077                                                                                          | 1.018                                                                                                                                                                 |
| <i>R</i> <sub>1</sub> / <i>wR</i> <sub>2</sub> for <i>I</i> > 2σ( <i>I</i> ) | 0.0736 / 0.2032                                                                 | 0.0463 / 0.1268                                                                                | 0.0634 / 0.1400                                                                                                                                                       |
| <i>R</i> <sub>1</sub> / <i>wR</i> <sub>2</sub> (all data)                    | 0.0824 / 0.2096                                                                 | 0.0473 / 0.1275                                                                                | 0.1336 / 0.1786                                                                                                                                                       |
| Δ <i>Q</i> <sub>max</sub> / Δ <i>Q</i> <sub>min</sub> , e·Å <sup>-3</sup>    | 1.049 / –0.559                                                                  | 0.643 / –0.650                                                                                 | 1.032 / –0.578                                                                                                                                                        |

**Table S1.3.** Selected bond distances in **1** (Å).

| Bond         | Distance   | Bond         | Distance   | Bond          | Distance |
|--------------|------------|--------------|------------|---------------|----------|
| Mn(1)–O(2)#1 | 2.1428(11) | F(1)–C(4)    | 1.332(2)   | F(8)–C(16)    | 1.326(3) |
| Mn(1)–O(2)   | 2.1427(11) | F(2)–C(4)    | 1.324(2)   | C(17A)–F(9A)  | 1.318(4) |
| Mn(1)–O(3)#1 | 2.1420(12) | C(12A)–F(3A) | 1.348(4)   | C(17A)–F(10A) | 1.322(4) |
| Mn(1)–O(3)   | 2.1420(12) | C(12A)–F(4A) | 1.313(4)   | C(17A)–F(11A) | 1.333(4) |
| Mn(1)–O(4)   | 2.1363(12) | C(12A)–F(5A) | 1.330(3)   | C(17A)–C(18)  | 1.535(4) |
| Mn(1)–O(4)#1 | 2.1362(12) | C(12A)–C(13) | 1.548(3)   | C(17B)–F(9B)  | 1.319(2) |
| Mn(2)–O(5)#2 | 2.1321(11) | C(12B)–F(3B) | 1.348(4)   | C(17B)–F(10B) | 1.323(3) |
| Mn(2)–O(5)   | 2.1322(11) | C(12B)–F(4B) | 1.313(4)   | C(17B)–F(11B) | 1.334(3) |
| Mn(2)–O(6)   | 2.1378(11) | C(12B)–F(5B) | 1.330(3)   | C(17B)–C(18)  | 1.536(2) |
| Mn(2)–O(6)#2 | 2.1378(11) | C(12B)–C(13) | 1.547(3)   | F(12)–C(21)   | 1.336(2) |
| Mn(2)–N(2)   | 2.2966(13) | F(6)–C(16)   | 1.335(3)   | F(13)–C(21)   | 1.334(2) |
| Mn(2)–N(2)#2 | 2.2966(13) | F(7)–C(16)   | 1.332(2)   | F(14)–C(21)   | 1.326(2) |
| O(1)–N(3)    | 1.2730(18) | N(1)–C(3)    | 1.345(2)   | C(1)–C(2)     | 1.418(2) |
| O(2)–N(4)    | 1.3027(17) | N(1)–C(4)    | 1.439(2)   | C(2)–C(3)     | 1.380(2) |
| O(3)–C(13)   | 1.247(2)   | N(2)–C(1)    | 1.325(2)   | C(2)–C(5)     | 1.439(2) |
| O(4)–C(15)   | 1.255(2)   | N(3)–C(5)    | 1.356(2)   | C(6)–C(7)     | 1.519(2) |
| O(5)–C(18)   | 1.259(2)   | N(3)–C(6)    | 1.504(2)   | C(6)–C(8)     | 1.530(2) |
| O(6)–C(20)   | 1.250(2)   | N(4)–C(5)    | 1.336(2)   | C(6)–C(9)     | 1.554(2) |
| N(1)–N(2)    | 1.3694(18) | N(4)–C(9)    | 1.5027(19) | C(9)–C(10)    | 1.532(2) |
| C(9)–C(11)   | 1.522(2)   | C(14)–C(15)  | 1.387(3)   | C(18)–C(19)   | 1.388(2) |
| C(13)–C(14)  | 1.397(3)   | C(15)–C(16)  | 1.537(3)   | C(19)–C(20)   | 1.397(2) |
| C(20)–C(21)  | 1.539(2)   |              |            |               |          |

**Table S1.4.** Selected bond distances in **2** (Å).

| Bond         | Distance | Bond       | Distance | Bond        | Distance |
|--------------|----------|------------|----------|-------------|----------|
| Mn(1)–O(1)   | 2.145(2) | O(6)–C(21) | 1.254(4) | C(20)–C(21) | 1.386(5) |
| Mn(1)–O(3)   | 2.130(2) | N(1)–C(1)  | 1.324(4) | C(21)–C(22) | 1.524(5) |
| Mn(1)–O(4)   | 2.176(2) | N(1)–C(2)  | 1.501(3) | C(4)–C(6)   | 1.408(4) |
| Mn(1)–O(5)   | 2.144(2) | N(2)–C(1)  | 1.354(4) | C(11)–C(12) | 1.498(5) |
| Mn(1)–O(6)   | 2.173(2) | N(2)–C(3)  | 1.506(4) | C(13)–C(14) | 1.532(5) |
| Mn(1)–N(3)#1 | 2.236(2) | N(3)–N(4)  | 1.365(3) | C(14)–C(15) | 1.390(5) |
| F(1)–C(12)   | 1.400(4) | N(3)–C(6)  | 1.331(4) | C(15)–C(16) | 1.384(5) |
| F(2)–C(13)   | 1.335(5) | N(4)–C(5)  | 1.345(4) | C(16)–C(17) | 1.539(4) |
| F(3)–C(13)   | 1.327(5) | N(4)–C(11) | 1.457(4) | C(18)–C(19) | 1.530(4) |
| F(4)–C(13)   | 1.327(4) | C(1)–C(4)  | 1.439(4) | C(19)–C(20) | 1.380(5) |
| F(5)–C(17)   | 1.333(4) | C(2)–C(3)  | 1.558(4) | F(11)–C(22) | 1.327(5) |
| F(6)–C(17)   | 1.327(4) | C(2)–C(7)  | 1.515(4) | F(12)–C(22) | 1.355(6) |
| F(7)–C(17)   | 1.313(4) | C(2)–C(8)  | 1.535(5) | F(13)–C(22) | 1.339(6) |
| F(8)–C(18)   | 1.320(4) | C(3)–C(9)  | 1.524(5) | O(1)–N(1)   | 1.305(3) |
| F(9)–C(18)   | 1.333(5) | C(3)–C(10) | 1.522(4) | O(2)–N(2)   | 1.278(3) |
| F(10)–C(18)  | 1.316(5) | C(4)–C(5)  | 1.391(4) | O(3)–C(14)  | 1.256(4) |
| O(4)–C(16)   | 1.256(3) | O(5)–C(19) | 1.259(3) |             |          |

**Table S1.5.** Selected bond distances in 3·C<sub>7</sub>H<sub>8</sub> (Å).

| Bond          | Distance  | Bond          | Distance | Bond          | Distance  |
|---------------|-----------|---------------|----------|---------------|-----------|
| Mn(1)–O(1)    | 2.138(3)  | C(24)–F(12A)  | 1.326(3) | C(11B)–C(12B) | 1.503(8)  |
| Mn(1)–O(3)    | 2.138(3)  | C(24)–F(13A)  | 1.325(3) | F(1B)–C(12B)  | 1.382(8)  |
| Mn(1)–O(4)    | 2.169(2)  | C(24)–F(11B)  | 1.326(4) | C(12B)–F(14B) | 1.281(9)  |
| Mn(1)–O(5)    | 2.126(2)  | C(24)–F(12B)  | 1.326(4) | C(16)–C(17)   | 1.380(5)  |
| Mn(1)–O(6)    | 2.157(3)  | C(24)–F(13B)  | 1.326(4) | C(17)–C(18)   | 1.391(5)  |
| Mn(1)–N(4)#1  | 2.244(3)  | C(24)–F(11C)  | 1.326(4) | C(21)–C(22)   | 1.392(6)  |
| F(2A)–C(15A)  | 1.337(3)  | C(24)–F(12C)  | 1.326(4) | C(22)–C(23)   | 1.390(6)  |
| F(3A)–C(15A)  | 1.337(3)  | C(24)–F(13C)  | 1.326(4) | C(25A)–C(26A) | 1.378(3)  |
| F(4A)–C(15A)  | 1.337(3)  | C(24)–C(23)   | 1.539(7) | C(25A)–C(30A) | 1.377(3)  |
| C(15A)–C(16)  | 1.544(12) | O(1)–N(1)     | 1.309(4) | C(25A)–C(31A) | 1.483(10) |
| F(2B)–C(15B)  | 1.337(4)  | O(2)–N(2)     | 1.274(4) | C(26A)–C(27A) | 1.379(3)  |
| F(3B)–C(15B)  | 1.337(4)  | O(3)–C(16)    | 1.260(5) | C(27A)–C(28A) | 1.377(3)  |
| F(4B)–C(15B)  | 1.337(4)  | O(4)–C(18)    | 1.252(5) | C(28A)–C(29A) | 1.377(3)  |
| C(15B)–C(16)  | 1.55(2)   | O(5)–C(21)    | 1.248(5) | C(29A)–C(30A) | 1.378(3)  |
| F(5A)–C(19A)  | 1.313(3)  | O(6)–C(23)    | 1.242(5) | C(25B)–C(26B) | 1.378(4)  |
| F(6A)–C(19A)  | 1.314(3)  | N(1)–C(1)     | 1.331(4) | C(25B)–C(30B) | 1.379(4)  |
| F(7A)–C(19A)  | 1.318(3)  | N(1)–C(2)     | 1.493(4) | C(25B)–C(31B) | 1.484(10) |
| C(19A)–C(18)  | 1.538(5)  | N(2)–C(1)     | 1.355(5) | C(26B)–C(27B) | 1.378(4)  |
| F(5B)–C(19B)  | 1.314(4)  | N(2)–C(3)     | 1.497(5) | C(27B)–C(28B) | 1.378(4)  |
| F(6B)–C(19B)  | 1.315(4)  | N(3)–N(4)     | 1.366(4) | C(28B)–C(29B) | 1.378(4)  |
| F(7B)–C(19B)  | 1.315(4)  | N(3)–C(10)    | 1.341(4) | C(29B)–C(30B) | 1.378(4)  |
| C(19B)–C(18)  | 1.538(6)  | N(3)–C(11A)   | 1.455(5) |               |           |
| C(20A)–F(8A)  | 1.343(3)  | N(3)–C(11B)   | 1.455(5) |               |           |
| C(20A)–F(9A)  | 1.343(3)  | N(4)–C(9)     | 1.325(4) |               |           |
| C(20A)–F(10A) | 1.343(3)  | C(1)–C(8)     | 1.431(5) |               |           |
| C(20A)–C(21)  | 1.529(6)  | C(2)–C(3)     | 1.552(6) |               |           |
| C(20B)–F(8B)  | 1.340(4)  | C(2)–C(4)     | 1.521(5) |               |           |
| C(20B)–F(9B)  | 1.340(4)  | C(2)–C(5)     | 1.522(6) |               |           |
| C(20B)–F(10B) | 1.340(4)  | C(3)–C(6)     | 1.531(7) |               |           |
| C(20B)–C(21)  | 1.526(6)  | C(3)–C(7)     | 1.516(7) |               |           |
| C(20C)–F(8C)  | 1.343(4)  | C(8)–C(9)     | 1.414(5) |               |           |
| C(20C)–F(9C)  | 1.343(4)  | C(8)–C(10)    | 1.394(5) |               |           |
| C(20C)–F(10C) | 1.343(4)  | C(11A)–C(12A) | 1.503(8) |               |           |
| C(20C)–C(21)  | 1.529(6)  | F(1A)–C(12A)  | 1.382(8) |               |           |
| C(24)–F(11A)  | 1.326(3)  | C(12A)–F(14A) | 1.283(8) |               |           |

**Table S1.6.** Selected bond distances in **3** (Å).

| Bond                    | Distance    | Bond                     | Distance  | Bond        | Distance  |
|-------------------------|-------------|--------------------------|-----------|-------------|-----------|
| Mn(1)—O(1)              | 2.1467 (18) | O(1)—N(1)                | 1.310 (3) | C(2)—C(3)   | 1.551 (4) |
| Mn(1)—O(3)              | 2.1606 (19) | O(2)—N(2)                | 1.277 (3) | C(2)—C(7)   | 1.532 (4) |
| Mn(1)—O(4)              | 2.1392 (19) | O(3)—C(13)               | 1.249 (3) | C(2)—C(8)   | 1.513 (4) |
| Mn(1)—O(5)              | 2.126 (2)   | O(4)—C(15)               | 1.262 (3) | C(3)—C(9)   | 1.521 (4) |
| Mn(1)—O(6)              | 2.1780 (19) | O(5)—C(20)               | 1.251 (3) | C(3)—C(10)  | 1.528 (4) |
| Mn(1)—N(4) <sup>i</sup> | 2.248 (2)   | O(6)—C(18)               | 1.258 (3) | C(4)—C(5)   | 1.388 (4) |
| F(1)—C(12)              | 1.363 (3)   | N(1)—C(1)                | 1.329 (3) | C(4)—C(6)   | 1.396 (4) |
| F(2)—C(12)              | 1.370 (3)   | N(1)—C(2)                | 1.495 (3) | C(11)—C(12) | 1.499 (4) |
| F(3)—C(16)              | 1.328 (4)   | N(2)—C(1)                | 1.355 (3) | C(13)—C(14) | 1.398 (4) |
| F(4)—C(16)              | 1.348 (4)   | N(2)—C(3)                | 1.509 (4) | C(13)—C(16) | 1.538 (4) |
| F(5)—C(16)              | 1.327 (3)   | N(3)—N(4)                | 1.359 (3) | C(14)—C(15) | 1.378 (4) |
| F(6)—C(17)              | 1.310 (3)   | N(3)—C(5)                | 1.334 (3) | C(15)—C(17) | 1.528 (4) |
| F(7)—C(17)              | 1.335 (4)   | N(3)—C(11)               | 1.459 (3) | C(18)—C(19) | 1.381 (4) |
| F(8)—C(17)              | 1.328 (4)   | N(4)—Mn(1) <sup>ii</sup> | 2.248 (2) | C(18)—C(22) | 1.531 (4) |
| F(9)—C(21)              | 1.328 (4)   | N(4)—C(6)                | 1.326 (3) | C(19)—C(20) | 1.394 (4) |
| F(10)—C(21)             | 1.334 (4)   | C(1)—C(4)                | 1.438 (4) | C(20)—C(21) | 1.534 (4) |
| F(11)—C(21)             | 1.313 (4)   |                          |           |             |           |
| F(12)—C(22)             | 1.332 (3)   |                          |           |             |           |
| F(13)—C(22)             | 1.336 (3)   |                          |           |             |           |
| F(14)—C(22)             | 1.327 (3)   |                          |           |             |           |

Symmetry codes: (i)  $-x+1, y+1/2, -z+3/2$ ; (ii)  $-x+1, y-1/2, -z+3/2$ .



**Table S1.7.** Selected bond distances in 4-C<sub>7</sub>H<sub>8</sub> (Å).

| Bond          | Distance   | Bond          | Distance | Bond          | Distance   |
|---------------|------------|---------------|----------|---------------|------------|
| Mn(1)–O(2)    | 2.1101(14) | O(5)–C(19)    | 1.248(3) | C(4)–C(3)     | 1.4328(16) |
| Mn(1)–O(3)    | 2.1534(14) | O(6)–C(21)    | 1.260(3) | C(24)–C(23)   | 1.4331(16) |
| Mn(1)–O(4)    | 2.1776(15) | N(1)–C(1)     | 1.345(3) | C(1)–C(5)     | 1.4866(16) |
| Mn(1)–O(5)    | 2.1769(15) | N(1)–C(2)     | 1.507(3) | C(2)–C(3)     | 1.3707(17) |
| Mn(1)–O(6)    | 2.1327(14) | N(2)–C(1)     | 1.336(3) | C(3)–C(12)    | 1.5150(15) |
| Mn(1)–N(4)#1  | 2.2779(18) | N(2)–C(3)     | 1.502(2) | C(23)–C(32)   | 1.5108(15) |
| F(1)–C(12)    | 1.336(3)   | N(3)–N(4)     | 1.372(2) | C(21)–C(25)   | 1.4861(15) |
| F(2)–C(12)    | 1.337(2)   | N(3)–C(9)     | 1.343(3) | C(15)–C(14)   | 1.5147(16) |
| F(3)–C(12)    | 1.332(3)   | N(3)–C(11)    | 1.451(2) | C(15)–C(16)   | 1.3892(18) |
| F(4)–C(13)    | 1.319(3)   | N(4)–C(10)    | 1.331(3) | C(15)–C(20)   | 1.3918(17) |
| F(5)–C(13)    | 1.328(3)   | C(1)–C(8)     | 1.443(3) | C(32)–C(33)   | 1.4957(16) |
| F(6)–C(13)    | 1.328(3)   | C(2)–C(3)     | 1.563(3) | C(5)–C(10)    | 1.3924(18) |
| F(7A)–C(17A)  | 1.334(5)   | C(2)–C(4)     | 1.522(3) | C(23B)–C(29B) | 1.507(7)   |
| F(8A)–C(17A)  | 1.311(5)   | C(2)–C(5)     | 1.522(4) | C(24B)–C(25B) | 1.384(3)   |
| F(9A)–C(17A)  | 1.332(5)   | C(3)–C(6)     | 1.532(3) | C(25B)–C(26B) | 1.385(3)   |
| C(17A)–C(16)  | 1.541(4)   | C(3)–C(7)     | 1.519(3) | C(26B)–C(27B) | 1.386(3)   |
| F(7B)–C(17B)  | 1.341(6)   | C(8)–C(9)     | 1.390(3) | C(27B)–C(28B) | 1.386(3)   |
| F(8B)–C(17B)  | 1.319(6)   | C(8)–C(10)    | 1.399(3) | C(25A)–C(26A) | 1.383(3)   |
| F(9B)–C(17B)  | 1.339(5)   | C(11)–C(12)   | 1.510(3) | C(26A)–C(27A) | 1.383(3)   |
| C(17B)–C(16)  | 1.549(4)   | C(13)–C(14)   | 1.537(3) | C(27A)–C(28A) | 1.384(3)   |
| F(7C)–C(17C)  | 1.334(6)   | C(14)–C(15)   | 1.388(3) | C(23B)–C(24B) | 1.384(3)   |
| F(8C)–C(17C)  | 1.312(6)   | C(15)–C(16)   | 1.399(3) | C(23B)–C(28B) | 1.386(3)   |
| F(9C)–C(17C)  | 1.332(5)   | C(19)–C(20)   | 1.401(3) | F(13)–C(22)   | 1.333(3)   |
| C(17C)–C(16)  | 1.542(4)   | C(20)–C(21)   | 1.388(3) | F(14)–C(22)   | 1.328(3)   |
| F(10A)–C(18A) | 1.324(4)   | C(21)–C(22)   | 1.537(3) | F(15)–C(22)   | 1.326(3)   |
| F(11A)–C(18A) | 1.336(4)   | C(23A)–C(24A) | 1.388(3) | O(1)–N(1)     | 1.272(3)   |
| F(12A)–C(18A) | 1.335(4)   | C(23A)–C(28A) | 1.385(3) | O(2)–N(2)     | 1.304(2)   |
| C(18A)–C(19)  | 1.543(3)   | C(23A)–C(29A) | 1.510(6) | O(3)–C(14)    | 1.247(3)   |
| F(10B)–C(18B) | 1.330(5)   | C(24A)–C(25A) | 1.384(3) | O(4)–C(16)    | 1.245(3)   |
| F(11B)–C(18B) | 1.340(5)   | F(12B)–C(18B) | 1.339(4) | C(18B)–C(19)  | 1.550(4)   |

## Section S2. Powder X-ray Diffraction Data

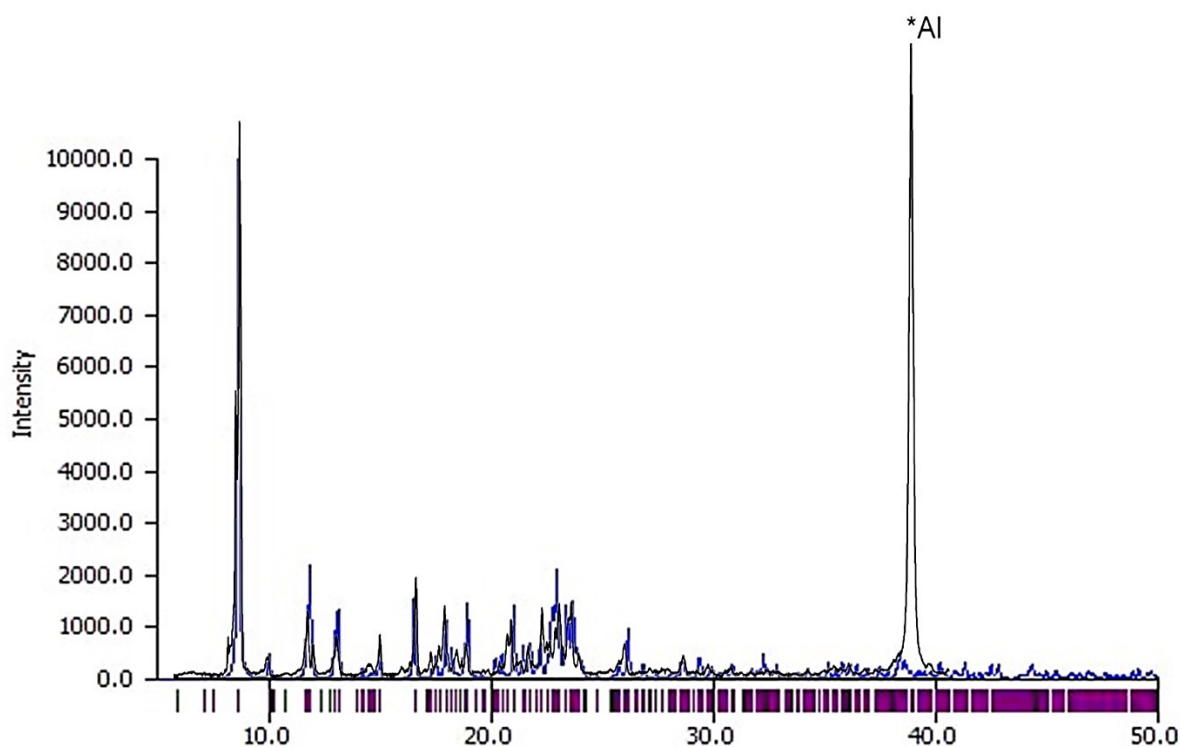

**Figure S2.1.** Experimental (black) and calculated (blue) powder X-ray diffraction pattern of 1.

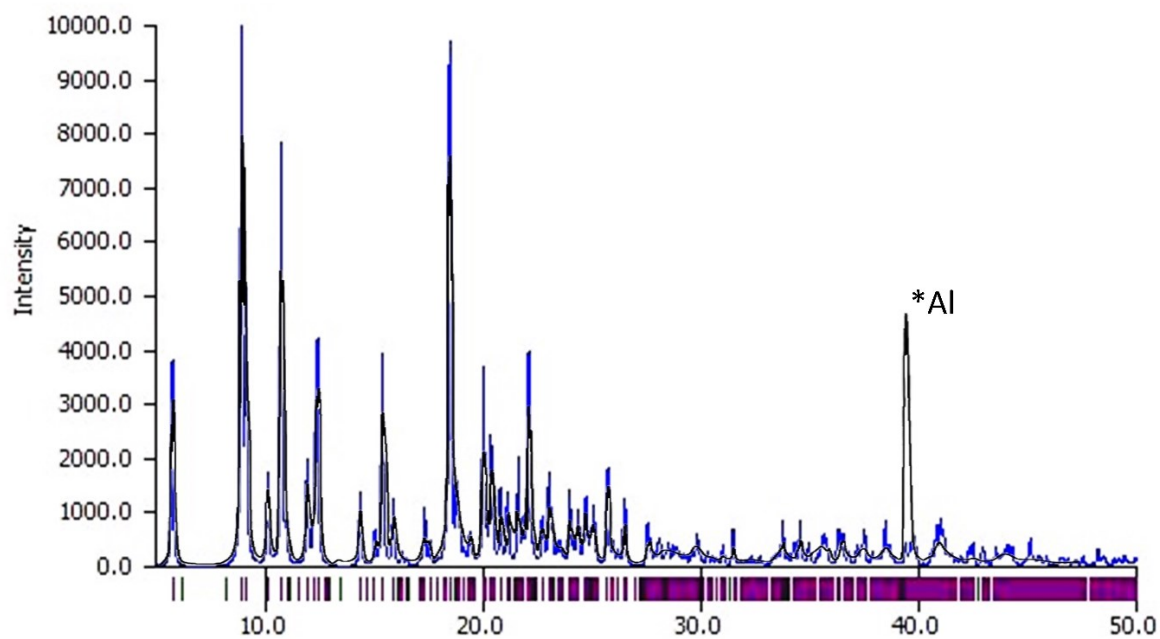

**Figure S2.2.** Experimental (black) and calculated (blue) powder X-ray diffraction pattern of 2.

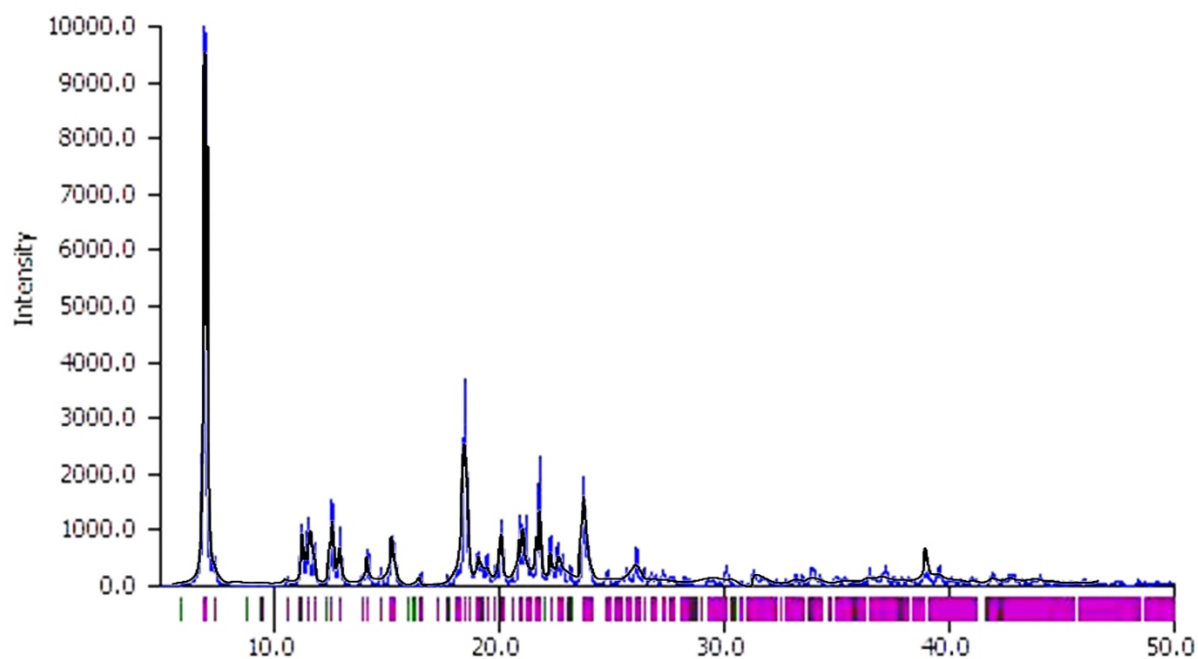

**Figure S2.3.** Experimental (black) and calculated (blue) powder X-ray diffraction pattern of 3·C<sub>7</sub>H<sub>8</sub>.

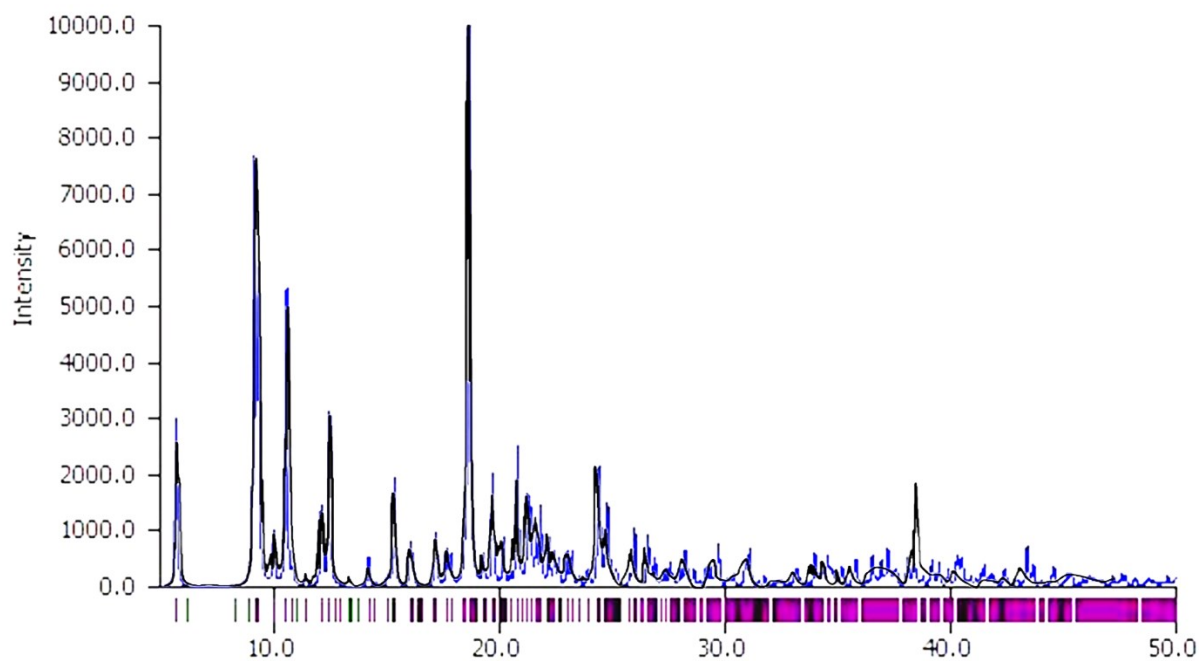

**Figure S2.4.** Experimental (black) and calculated (blue) powder X-ray diffraction pattern of 3.

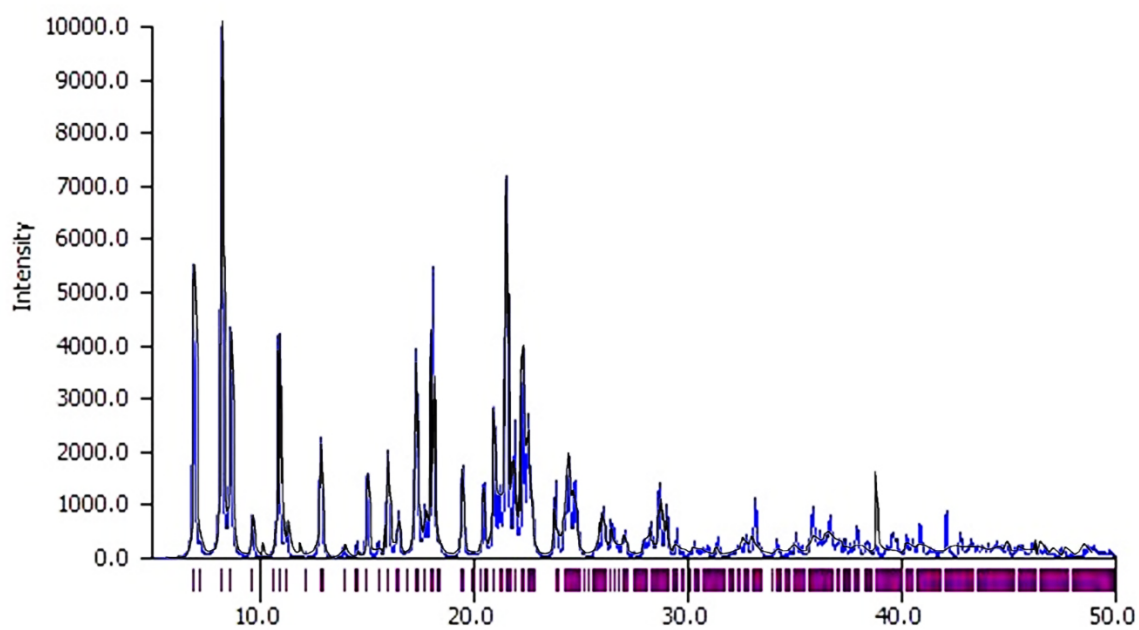

**Figure S2.5.** Experimental (black) and calculated (blue) powder X-ray diffraction pattern of  $4 \cdot \text{C}_7\text{H}_8$ .
